# Supplementary material
Source: Copernicus journal article supplement (doi:10.5194/egusphere-2026-1818)
Supplement: Supplementary file 1 [file egusphere-2026-1818-supplement.pdf]

1  
2 **Supplementary figures: General simulations**

3  
4 **Table S1 : Presentation of the different cellular states present in the simulations**

| Grid cell identity    | Value in the state matrix | Immutable | Associated with resources |
|-----------------------|---------------------------|-----------|---------------------------|
| Soil solid phase      | 3                         | Yes       | No                        |
| Air-filled porosity   | 30                        | Yes       | No                        |
| Water-filled porosity | 0                         | No        | No                        |
| Resource              | 2                         | No        | Yes                       |
| Motile r-strategist   | 1                         | No        | Yes                       |
| Immobile r-strategist | 4                         | No        | Yes                       |
| Motile K-strategist   | 7                         | No        | Yes                       |
| Immobile K-strategist | 8                         | No        | Yes                       |

5  
6  
7

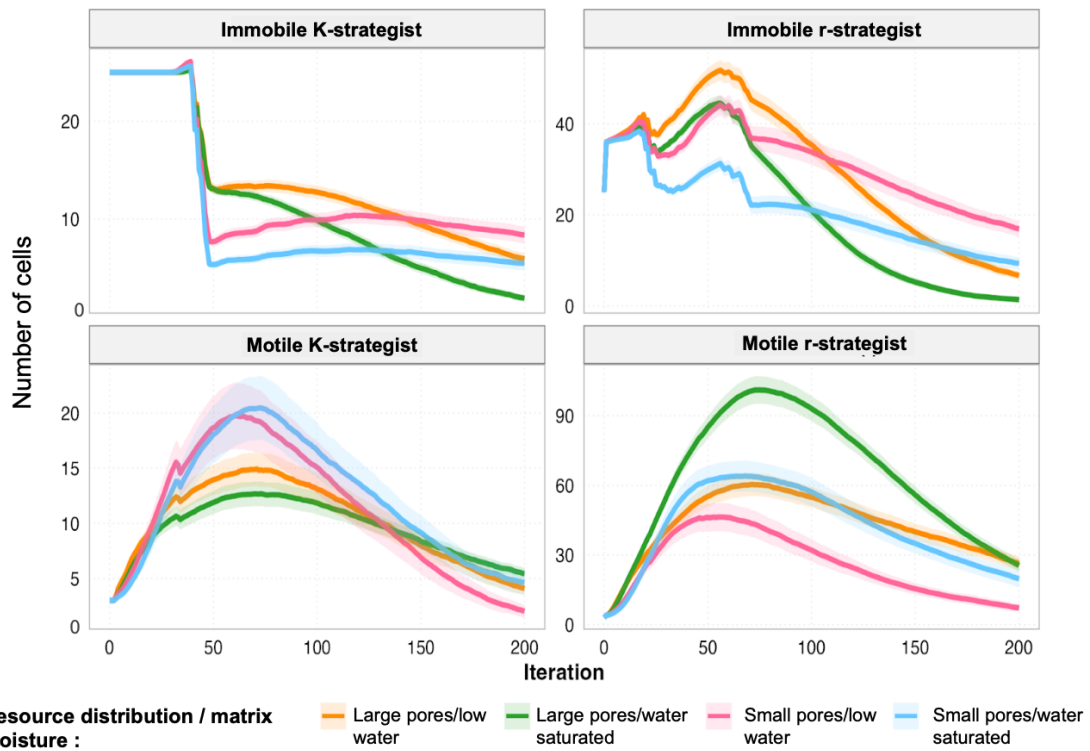

8  
9 **Figure S1 : Number of motile and immobile cells with either r- or K-strategies. Results for populations with 28 initial.**  
10 **The colors refer to the different initial matrix configurations, where, resources were distributed in the large pores**  
11 **(orange and green) or in the small pores (pink and blue). Matrices were either saturated with water (green and blue)**  
12 **or low water (pink and orange). For reasons of legibility, the scales used are different.**

13

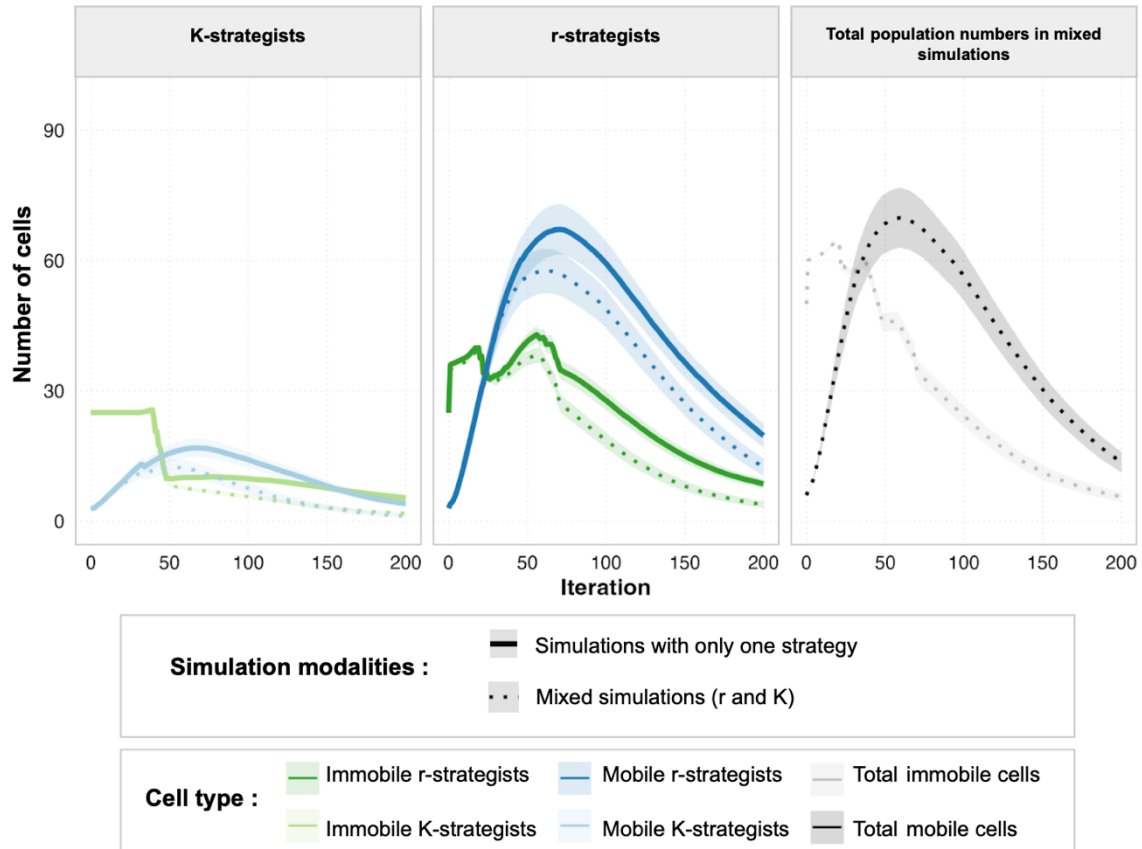

14

15 **Figure S2:** Graphical panel showing K-cell, r-cell and total cell populations for mixed simulations involving r-cells  
 16 (56) and K-cells (56) in the same matrix. Solid lines refer to simulations without competition: K50\_6 and r50\_6 corre-  
 17 spond to situations with K strategists only (50 immobile K cells and 6 motile K cells) and r strategists only (25 motile r  
 18 cells and 3 immobile r cells) respectively. The dashed lines (rK25\_3) show the results of simulations with competition,  
 19 where r and K cells have been added jointly to the matrices. The grey curve in the third panel is the sum of the immo-  
 20 bile K and r cells in the previous two panels. The black curve on the third facet is the sum of moving K and r cells on  
 21 the previous two facets.

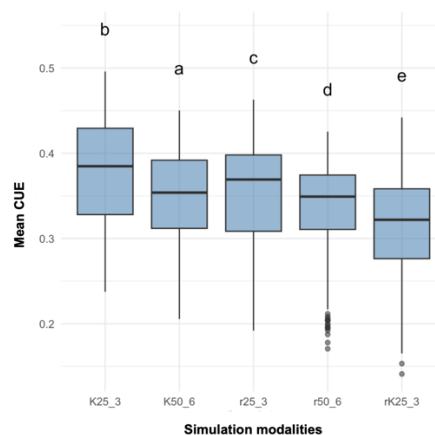

22

23 **Figure S3:** Box plot showing the effect of the simulation modalities on CUE. K25\_3 and K50\_6 correspond to situa-  
 24 tions with K strategists only (25 immobile K cells and 3 motile K cells or 50 motile K cells and 6 immobile K cells re-  
 25 spectively). r25\_3 and r50\_6 correspond to situations with r strategists only (25 immobile r cells and 3 motile r cells or  
 26 50 motile r cells and 6 immobile r cells respectively). rK25\_3 show the results of simulations with competition, where r  
 27 and K cells have been added jointly to the matrices (25 immobile K cells and 3 motile K cells with 25 motile r cells and  
 28 3 immobile r cells). The letters correspond to the statistical groups given by a Tukey analysis.

29  
30

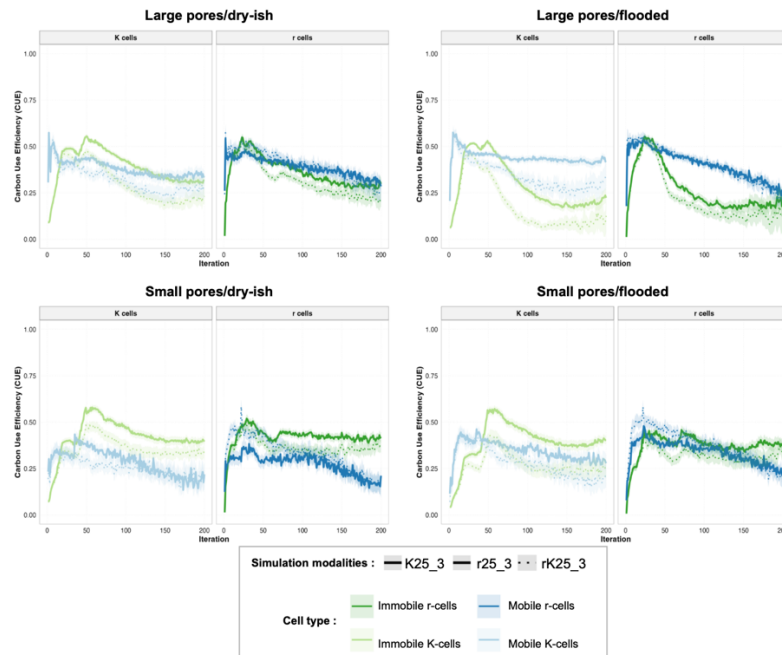

31  
32  
33  
34  
35  
36  
37

Figure S4 : Graphical panel showing the evolution of CUE over time in different initial matrix configurations, resources distributed in large pores or small pores with or without water saturation. Colors refer to the different cell types present in the matrices. Solid lines refer to simulations without competition: K25\_3 and r25\_3 correspond to situations with K strategists only (25 immobile K cells and 3 motile K cells) and r strategists only (25 motile r cells and 3 immobile r cells) respectively. The dashed lines show the results of simulations with competition, where r and K cells have been added jointly to the matrices.

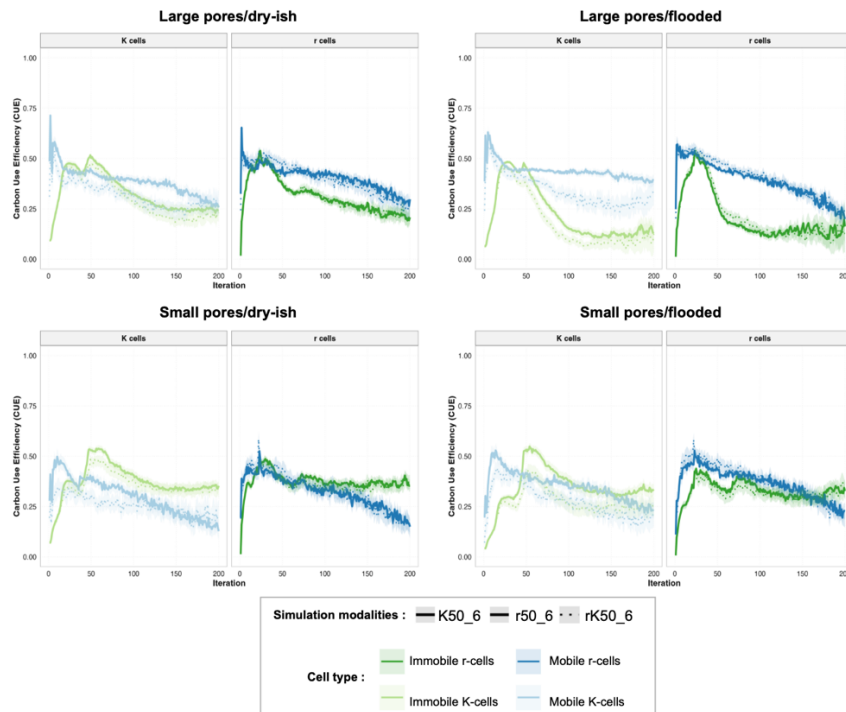

38  
39  
40  
41  
42

Figure S5 : Graphical panel showing the evolution of CUE over time in different initial matrix configurations, resources distributed in large pores or small pores with or without water saturation. Colors refer to the different cell types present in the matrices. Solid lines refer to simulations without competition: K50\_6 and r50\_6 correspond to situations with K strategists only (25 immobile K cells and 3 motile K cells) and r strategists only (25 motile r cells and 3 immobile r cells) respectively. The dashed lines show the results of simulations with competition, where r and K cells have been added jointly to the matrices.

43 immobile r cells) respectively. The dashed lines show the results of simulations with competition, where r and K cells  
44 have been added jointly to the matrices.

45  
46

#### 47 **Supplementary data: sensitivity tests**

48 To determine the automaton sensitivity to the various model parameters, additional simulations were carried out.  
49 As for the main analysis, for each complementary simulation studied, 20 repetitions of 200 iterations were set  
50 up.

51

### 52 **1 Effect of moisture**

#### 53 *Methods*

54 To characterize the effect of different humidity levels on the development of r and K cells, a series of morpho-  
55 logical expansions were applied to the solid elements of the matrix. For each level of dilation (parameter h vary-  
56 ing from 0 to 15), the solid phase cells were dilated using a square kernel of increasing size (from 1 to 31 pixels).  
57 Newly expanded cells that were neither solid-phase cells nor resources were converted into water-filled pore  
58 cells (value 0 in the matrix), simulating progressive humidification of the system.

59

60

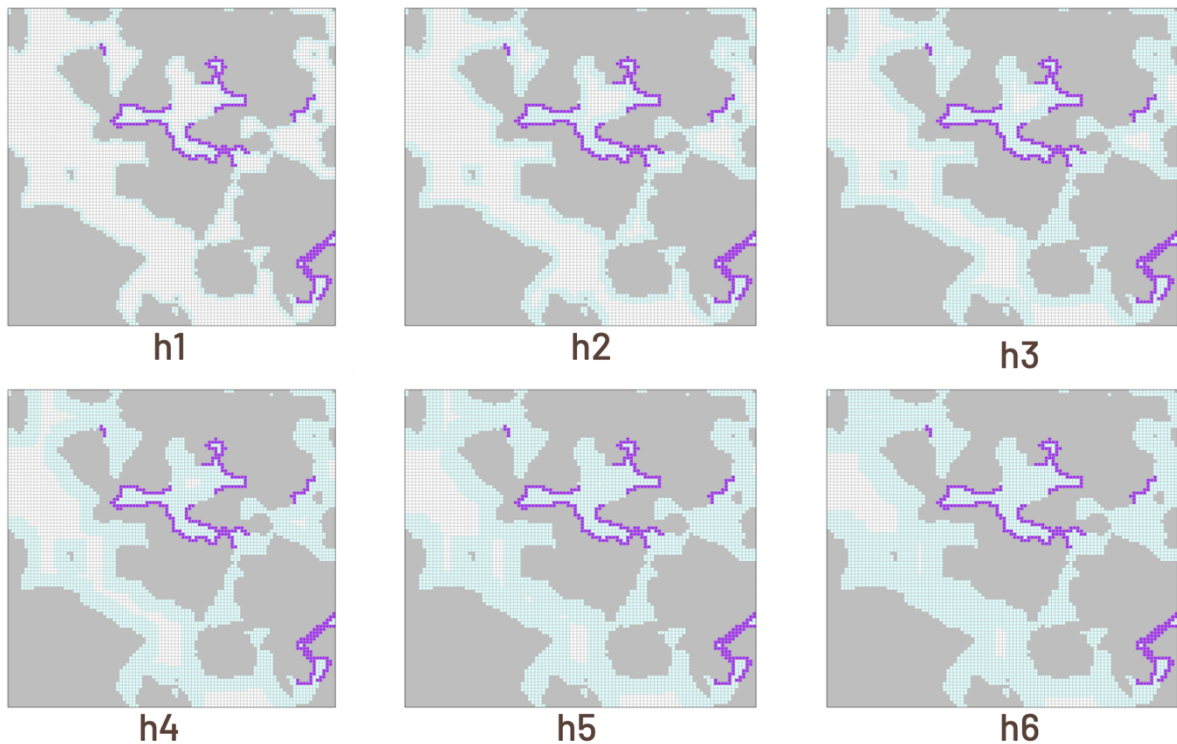

61

62 **Figure S6: Images of 6 matrices used to test the model's sensitivity to the level of moisture. Matrix h1 is the least hu-**  
63 **mid matrix (water film thickness covering solids and resources of 1 pixel), matrix h6 is a more humid matrix (water**  
64 **film thickness covering solids and resources of 6 pixels).**

65

#### 66 *Results*

67 Cell sensitivity to humidity only becomes apparent at the lowest humidity levels. Indeed, from a water film of 6  
 68 pixels, corresponding to a relatively high level of humidity, the smallest pores as well as a large proportion of the  
 69 widest pores are nearly completely saturated with water, making differences between conditions less discernible.  
 70 When resources are located in the largest pores, no significant effect of humidity was observed, either on motile  
 71 or immobile cell populations, or on their carbon utilization efficiency (CUE). On the other hand, when resources  
 72 are distributed in the smallest pores, humidity exerts a more marked influence. At the lowest moisture level (1  
 73 water film pixel), immobile cells had a higher average population ( $26.3 \pm 12.3$ ) ( $p < 0.001$ ) than motile cells ( $12.8$   
 74  $\pm 8.6$ ). The CUE of immobile cells ( $0.41 \pm 0.06$ ) was also higher ( $p < 0.001$ ) than that of motile cells ( $0.28 \pm$   
 75  $0.12$ ) at low humidity. This trend reversed at higher humidity levels, with a simultaneous increase ( $p < 0.001$ ) in  
 76 mean population ( $52.4 \pm 23.6$ ) and CUE ( $0.41 \pm 0.10$ ) associated with motile cells, and a decrease ( $p < 0.001$ ) in  
 77 mean population ( $16.3 \pm 15.3$ ) and CUE ( $0.20 \pm 0.15$ ) for immobile cells.

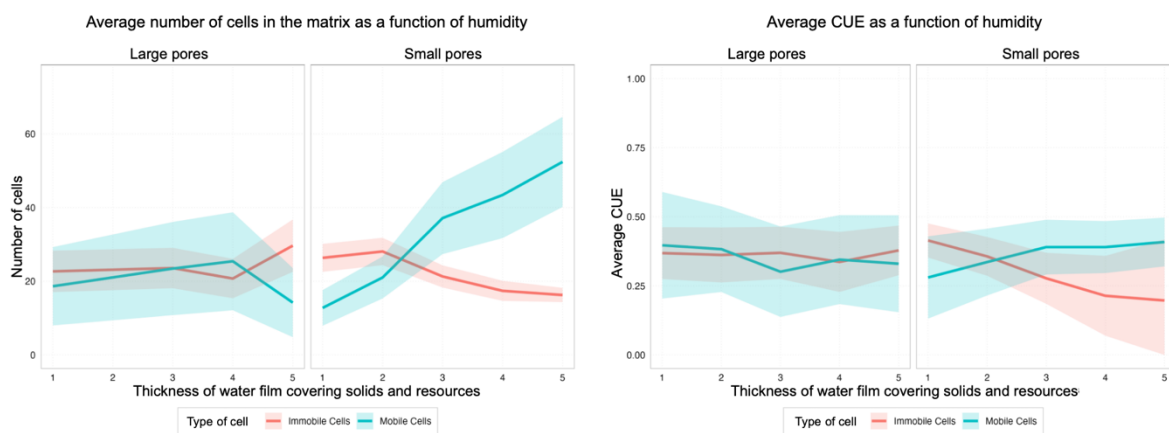

78  
 79 **Figure S7: Graph showing the effect of water film thickness on the population and CUE of immobile and motile cells.**  
 80 **Of the 15 moisture levels tested, only the top 5 are shown for both resource distribution pore sizes.**

## 82 Discussion

83 The parameters selected for the main simulations appear relevant, insofar as they clearly distinguish between  
 84 conditions with and without moisture constraints. Apart from extreme cases, the model seems relatively insensi-  
 85 tive to fine variations in humidity levels, suggesting the existence of thresholds beyond which humidity is no  
 86 longer a major limiting factor.

87 The results confirm that the main factors influencing motile cells are related to motility itself. These cells are  
 88 particularly disadvantaged in restricted environments, characterized by narrow pores and low humidity, where  
 89 the physical constraints on motility are increased. On the other hand, their performance improves markedly as  
 90 humidity increases, facilitating their movement. Paradoxically, in high-humidity conditions, motile cells may be  
 91 at an advantage when it comes to supplying resources to small pores, compared with distributions to larger pores,  
 92 as resources diffuse less and are therefore more valuable when consumed.

93 Conversely, immobile cells are impacted by two types of constraints: (i) diffusive limitations linked to excessive  
 94 humidity, which downgrades the nutritional value of resources, and (ii) exacerbated competition in environments  
 95 more favorable to the proliferation of motile cells, which can reduce their access to resources. So, while immo-  
 96 bile cells are less sensitive to variations in motility, they are more subject to the indirect effect of ecological dy-  
 97 namics induced by motile cells.

98  
99

## 100 2. Effect of resources concentration

### 101 *Methods*

102 To characterize the effect of initial resource concentration on the development of r- and K-type cell strategies,  
103 simulations were carried out by varying the concentration of resources available in the initial state. Eight levels  
104 of concentration were tested: 10, 25, 50, 75, 100, 150, 200 and 300 resource units of Resource per resource cell.  
105 The spatial distribution of resources was carried out in two modalities: either in large pores or in small pores. For  
106 each experimental condition, 20 repetitions were performed, each during 200 simulation iterations, using water-  
107 saturated matrices.

108

### 109 *Results*

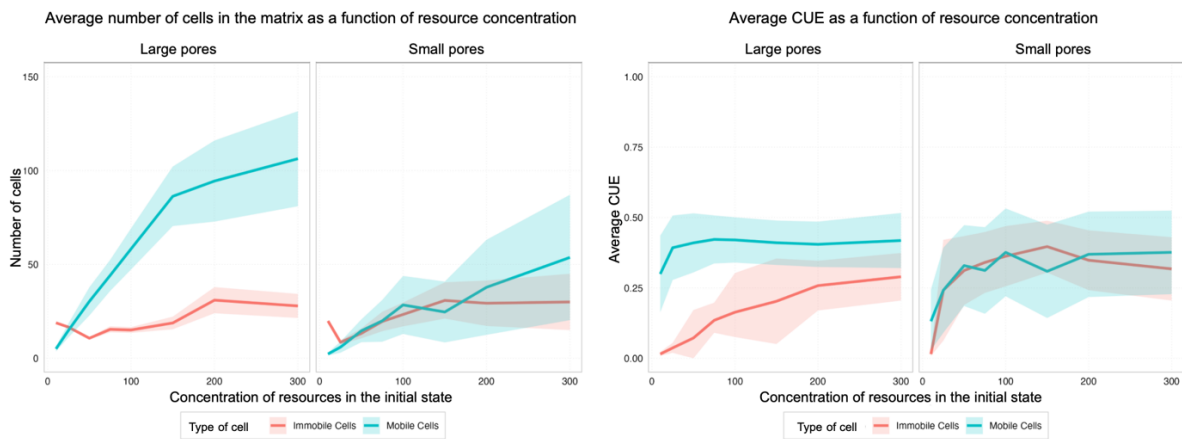

110

111 **Figure S8: Graph showing the effect of resources concentration on the population and CUE of immobile and motile**  
112 **cells. 8 levels of concentration were tested 10, 25, 50, 75, 100, 150, 200 and 300 units of resource per resource cell.**

113

114 In terms of cell number, when resource concentration is low (10 to 25 units of resource), resource consumption  
115 does not compensate for the benefits of movement for motile cells. Under these conditions, it is the immobile  
116 cells, with lower resource expenditure, that show better survival and higher average populations ( $p < 0.0001$ ).  
117 Generally, the increase in resource concentration is more favorable to motile cells, which will be able to move  
118 and consume more resources. In small pores, colonization dynamics remain limited, probably due to poor physi-  
119 cal accessibility. However, once resources are diffused into these zones, their concentration remains high, which  
120 can compensate for the lack of motility and enable immobile cells to thrive. When resources are delivered to  
121 large pores, cell populations, particularly motile cells, appear to be less limited than in configurations where re-  
122 sources are located in small pores. A significantly higher capacity of motile cells to colonize the matrix is ob-  
123 served ( $p < 0.0001$ ).

124

125 For the carbon utilization efficiency (CUE), a stabilizing trend is observed above a certain resource concentra-  
126 tion threshold. In configurations where resources are distributed in large pores, motile cells quickly reach their  
127 maximum CUE ( $0.38 \pm 0.09$ ), while the cue of immobile cells continues to grow with increasing resource con-

128 centration (from  $0.02 \pm 0.04$  to  $0.32 \pm 0.07$ ). When resources are localized in small pores, CUE dynamics are  
 129 similar between motile and immobile cells, suggesting an attenuated effect of motility in these more constrained  
 130 environments

131

132 **Discussion**

133 In our main simulations, we chose a concentration of 100 resource units per resource cell. This choice represents  
 134 a compromise between two extremes: on the one hand, overly limiting conditions where resources become insuf-  
 135 ficient to allow the establishment of cell populations, and on the other, situations in which resources are so abun-  
 136 dant that they no longer constitute a constraint, leading to excessive cell growth. The results obtained on the  
 137 CUE confirm the relevance of this parameterization: at this concentration level, we observe differentiated and in-  
 138 formative dynamics between motile and immobile cells, whose behavior is modulated by the size of the pores in  
 139 which the resources are distributed.

140

141 **3. Effect of parameters governing living r and K cells**

142 **Methods**

143 To study the effect of the different parameters modified between r and K cells in a more targeted way, comple-  
 144 mentary simulations were carried out by modifying the parameters of the K and r-strategist cells 1 by 1. The  
 145 simulations performed can be considered as combinations of binary vectors of length 4, with two possibilities for  
 146 each parameter: 0 or 1. In the case of the r strategy, all parameters are ‘off’ (0000), while for the K strategy, all  
 147 parameters are ‘on’. Between these two situations, we find all our intermediate mixtures, simulations S1 to S14  
 148 (1000, 1100, etc.). The simulations were carried out on a control matrix with a maximum moisture level and for  
 149 both resource distributions, large pores and small pores.

150

151 **Table S2 : Summary of the various simulations implemented and their associated costs**

| Simulation Id | Motility cost<br>(m) | Maintenance<br>cost (M) | Reproduction cost<br>(r) | Reproduction threshold<br>(R) |
|---------------|----------------------|-------------------------|--------------------------|-------------------------------|
| r strategist  | 1                    | 1                       | 55                       | 100                           |
| S1            | 1                    | 1                       | 55                       | <b>250</b>                    |
| S2            | 1                    | 1                       | <b>70</b>                | 100                           |
| S3            | 1                    | <b>3</b>                | 55                       | 100                           |
| S4            | <b>5</b>             | 1                       | 55                       | 100                           |
| S5            | <b>5</b>             | <b>3</b>                | 55                       | 100                           |
| S6            | <b>5</b>             | 1                       | <b>70</b>                | 100                           |
| S7            | <b>5</b>             | 1                       | 55                       | <b>250</b>                    |
| S8            | 1                    | <b>3</b>                | <b>70</b>                | 100                           |
| S9            | 1                    | <b>3</b>                | 55                       | <b>250</b>                    |
| S10           | 1                    | 1                       | <b>70</b>                | <b>250</b>                    |
| S11           | <b>5</b>             | <b>3</b>                | <b>70</b>                | 100                           |

|              |   |   |    |     |
|--------------|---|---|----|-----|
| S12          | 5 | 1 | 70 | 250 |
| S13          | 5 | 3 | 55 | 250 |
| S14          | 1 | 3 | 70 | 250 |
| K strategist | 5 | 3 | 70 | 250 |

152

153 **Results**

154 Significant differences were detected in carbon use efficiency (CUE) between large-pore and small-pore condi-  
 155 tions. The effect of pore size on CUE ( $F=1149.13$  ;  $p<0.001$ ) was greater than the individual effects of the life  
 156 governing parameters, highlighting its strong influence on carbon use efficiency by microorganisms. It is im-  
 157 portant to note that pore size not only altered the overall CUE but also altered the combinations of parameters  
 158 that maximised CUE. These optimal strategies varied considerably between large and narrow pores, and the dif-  
 159 ferences were also modulated by cell motility, with motile and immobile cells exhibiting distinct combinations  
 160 of parameters that yielded the best results in each pore condition.

161

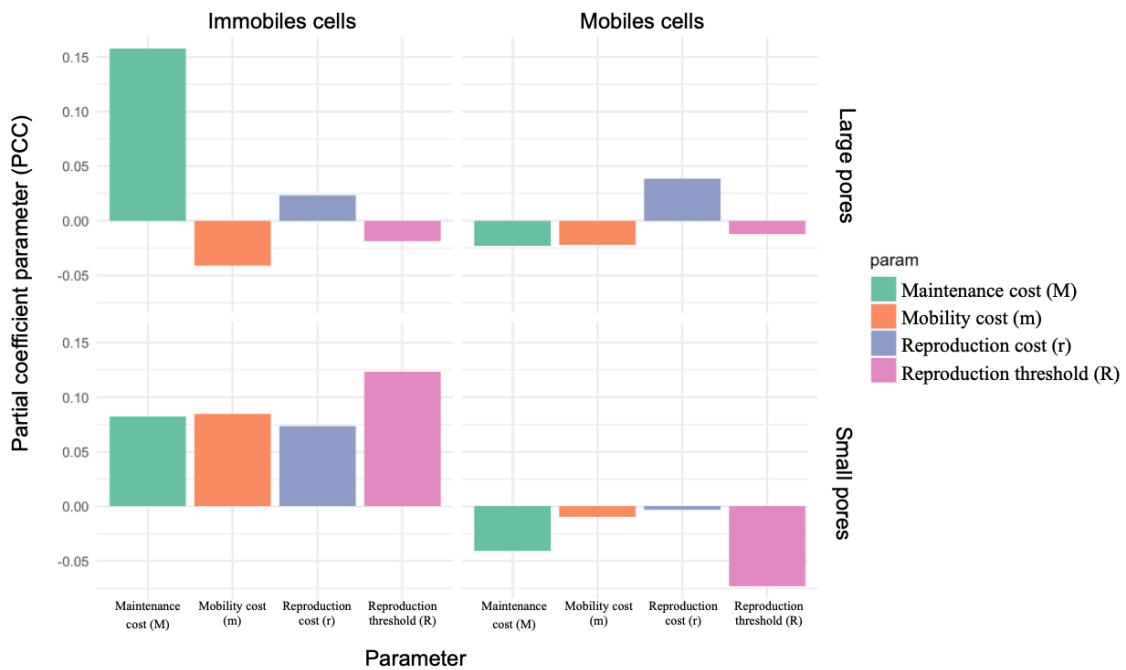

162

163 **Figure S9 : Graphic panel showing the partial coefficients by rank for the four parameters studied, the effects are**  
 164 **studied separately for each condition considered (pore x motility).**

165 To assess the relative influence of the four experimental parameters (motility cost, maintenance cost, reproduc-  
 166 tion cost, and reproduction threshold) on CUE, we used partial correlation coefficients by rank (PCC) (Saltelli et  
 167 al., 2000). The analysis was performed separately for each combination of pore size and motility to control for  
 168 the effects of other parameters. For motile cells in large pores, none of the parameters showed a significant effect  
 169 on output (PCC between  $-0.022$  and  $0.038$ ), indicating low overall sensitivity. For immobile cells in large pores,  
 170 maintenance cost appeared to be the most influential parameter (PCC =  $0.158$ ), while the other parameters had  
 171 marginal effects.

172 In small pores, motile cells showed a weak negative correlation with maintenance cost ( $PCC = -0.041$ ), with the  
 173 other parameters having little influence. For immobile cells, the reproduction threshold had the most significant  
 174 effect ( $PCC = 0.123$ ), followed by the other parameters with moderate coefficients ( $0.074-0.085$ ).  
 175 Overall, these results show that the sensitivity of the system depends heavily on cell type and porosity: immobile  
 176 cells are more influenced by maintenance or reproduction threshold, while motile cells appear relatively insensi-  
 177 tive to all parameters studied. These trends suggest that interventions targeting maintenance or reproduction  
 178 threshold could have a differential impact depending on the cell type and environment considered.  
 179

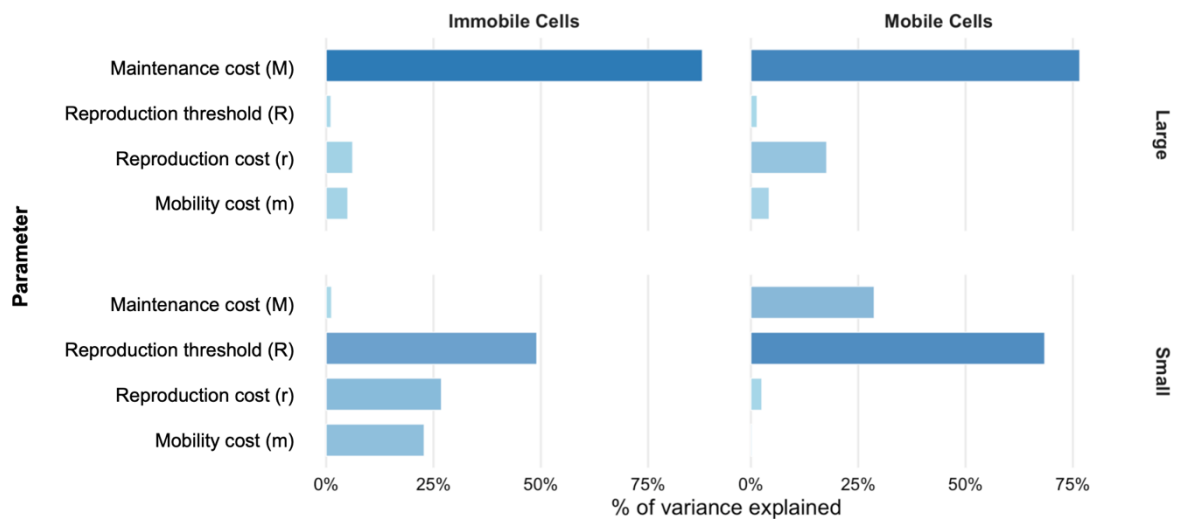

180  
 181 **Figure S10: Explained variance for each parameter without considering any interactions. The intensity of the blue**  
 182 **corresponds to the intensity of the parameter's effect. Given the significant interactions between the parameters, cell**  
 183 **type (mobile/immobile) and pore size, the effects are studied separately for each condition considered.**

184 In large pore environments, maintenance cost emerged as the dominant factor influencing CUE, explaining more  
 185 than 70% of the variance for both motile and immobile cells. For motile cells, strategies with a lower mainte-  
 186 nance cost consistently yielded higher CUE values. In contrast, for immobile cells, although the highest CUE  
 187 was observed when the maintenance cost was at its maximum. The parameter combinations producing the high-  
 188 est CUE in large pores were  $m1\_M1\_r70\_R100$  (**S2**) for motile cells ( $CUE = 0.404 \pm 0.099$ )  
 189 and  $m1\_M3\_r70\_R100$  (**S8**) for immobile cells (mean  $CUE = 0.199 \pm 0.154$ ).

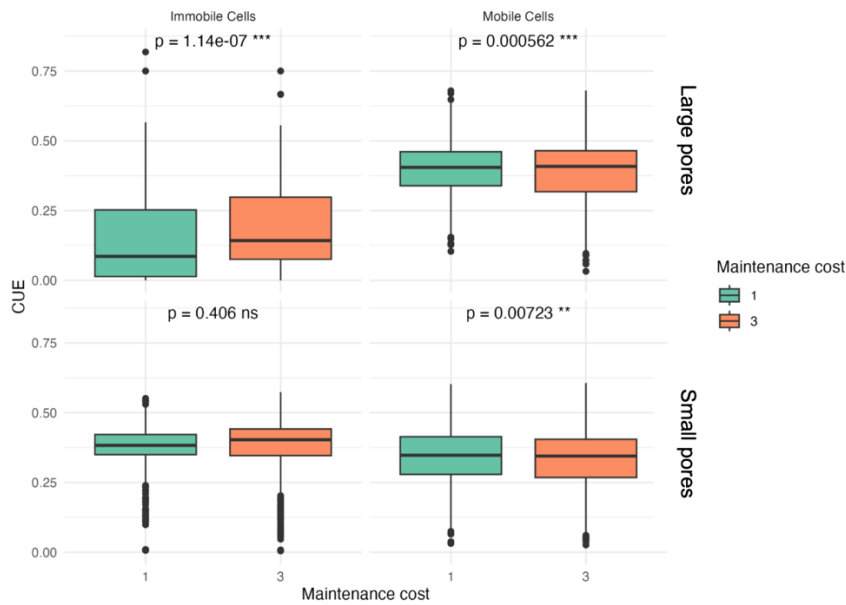

190

191 **Figure S11: Distribution of CUE as a function of maintenance cost for different pore sizes (across rows) and different**  
 192 **types of living cells (across columns). Maintenance cost is the individual parameter that best explains the observed**  
 193 **variance in large pores.**

194

195 In small pore environments, reproduction threshold emerged as the dominant factor influencing CUE, explaining  
 196 more than 45% of the variance for both motile and immobile cells. For motile cells, strategies with a lower re-  
 197 production threshold (100) yielded higher CUE values. For immobile cells, the highest CUE was observed when  
 198 the reproduction threshold was at its maximum (250). The parameter combinations producing the highest CUE  
 199 in large pores were m1\_M1\_r55\_R100 (**r complete**) for motile cells (CUE =  $0.404 \pm 0.099$ )  
 200 and m5\_M3\_r55\_R250 (**S13**) for immobile cells (mean CUE =  $0.199 \pm 0.154$ ).

201

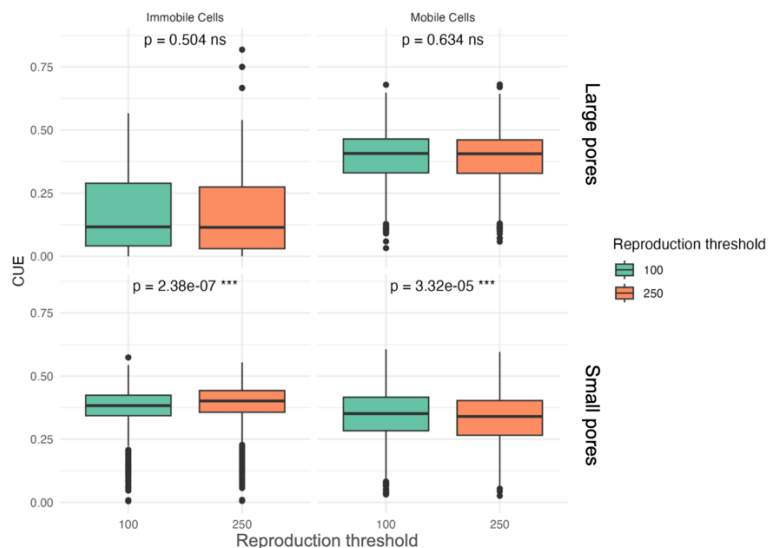

202

203 **Figure S12 : Distribution of CUE as a function of reproduction threshold for different pore sizes (across rows) and**  
 204 **different types of living cells (across columns). Reproduction threshold cost is the individual parameter that best ex-**  
 205 **plains the observed variance in large pores.**

206

207

208 In the case of our simulations, we might expect strategies r (0000) and K (1111) to be the most different from  
209 each other and their effect on CUE to be the most opposite, thus resulting in a very negative or at least very weak  
210 correlation. However, analysis of the correlation matrices shows that the r and K simulations are never the most  
211 different, regardless of the type of living cell (mobile or immobile) or the pore size considered.

212

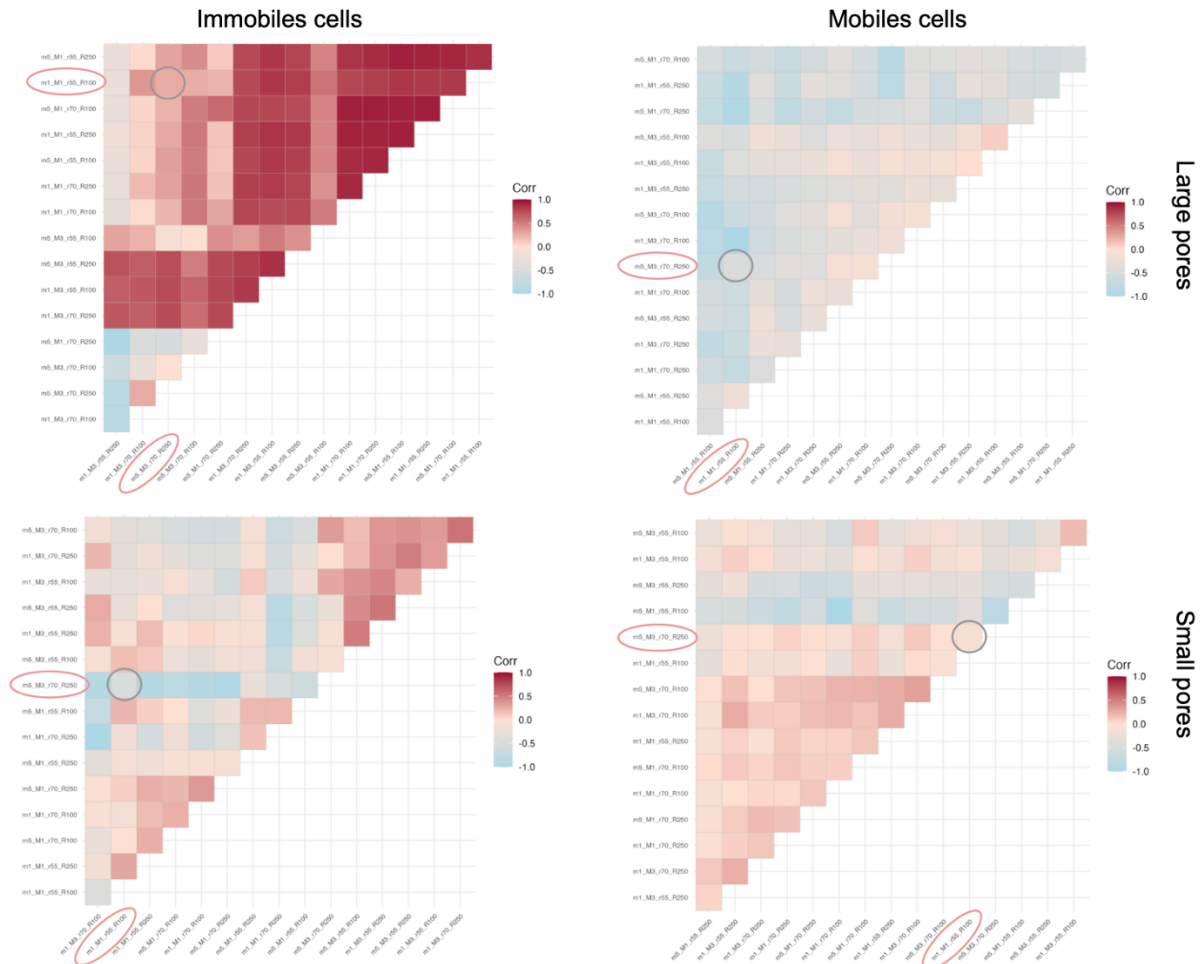

213

214 **Figure S13 : Diagram showing the correlations between K and r simulations and those ranging from S1 to S14 for the**  
215 **different pore sizes and the two types of cells considered. The legends refer to the codes used in Supplementary Table**  
216 **1, with m (motility cost), M (maintenance cost), r (reproduction cost) and R (reproduction threshold). The codes are**  
217 **followed by the associated resource point cost in the simulation, for example m1\_M1\_r55\_R100 corresponds to the**  
218 **complete r simulation (motility cost = 1, maintenance cost = 1, reproduction cost = 55 and reproduction threshold =**  
219 **100). The ellipses on the graph indicate the R and K strategies and their comparison.**

220

221 This indicates that the effect of the parameters on CUE is not simply additive or independent. For example, cer-  
222 tain partial combinations (S1, S2, etc.) can influence CUE more radically or unexpectedly than the direct transi-  
223 tion from strategies r (0000) to K (1111). A Cramer analysis showed very low values ( $>0.01$ ) for most parameter  
224 pairs, indicating a weak categorical association between parameters. There is one exception for the Immobile  
225 Cells group in large pores, where some values are slightly higher (0.03-0.05), but still low. This suggests that  
226 these parameters do not have strong redundancy or direct masking with each other; they appear to be relatively  
227 independent.

228

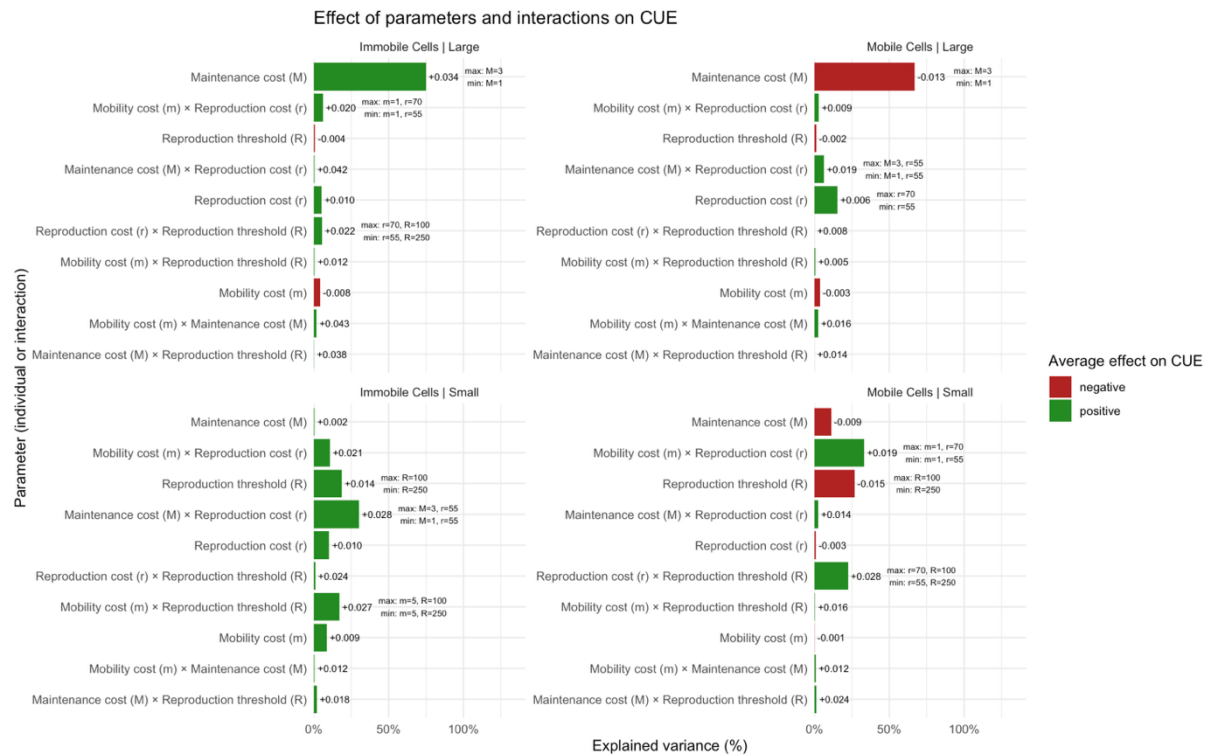

229

230 **Figure S14: Correlation plot showing, for each combination of cell type (Mobile Cells or Immobile Cells) and pore type**  
 231 **(Gou P), the relative importance of individual parameters and their interactions in explaining the variance in CUE.**  
 232 **Each bar corresponds to a term in the linear model, which can be a simple effect: a single parameter or an interaction**  
 233 **between two parameters. The colour of the bars shows the average effect of the parameter on CUE. Green (positive**  
 234 **effect): average increase in CUE when the parameter increases (or moves to a higher level). Red (negative effect):**  
 235 **average decrease in CUE when the parameter increases. The numbers to the right of the bars refer to the average**  
 236 **effect of the parameter on the CUE, calculated differently depending on the type of term. For simple effects, this is the**  
 237 **average CUE difference between the two levels of the parameter (highest level minus lowest level). For interactions, it is**  
 238 **the difference between the highest average and the lowest average among all possible combinations of the levels of the**  
 239 **two parameters. These values are expressed directly in CUE units (for example, +0.034 indicates that the CUE**  
 240 **increases by an average of 0.034 when the parameter changes from its low level to its high level). For the three**  
 241 **parameters or combinations of parameters that best explain the variance, the parameter values that yield the maximum**  
 242 **(max) and minimum (min) CUE are specified.**

243 The significant effect of certain partial combinations of parameters (S1, S2, etc.) on the CUE can be explained  
 244 by the presence of significant interaction effects. These interactions between the various parameters governing  
 245 the life of living cells are modulated by the size of the pores and the type of cell considered. In the largest pores,  
 246 interaction effects explain only a marginal part of the variance observed. In contrast, in small pores, interaction  
 247 effects explain a larger part of the variance. Furthermore, the predominant interactions are not the same for all  
 248 types of living cells studied. In the case of immobile cells, the interaction between the cost of maintenance and  
 249 the cost of reproduction is the most important: the combination ‘maintenance cost = 3 and reproduction cost =  
 250 55’ maximizes the CUE, while a maintenance cost = 1 and reproduction cost = 55 gives a lower CUE. In the  
 251 case of motile cells, it is the interaction between the cost of motility and the cost of reproduction that explains  
 252 most of the variance, with maximum CUE observed when the cost of motility = 1 and the cost of reproduction =  
 253 70, and lower CUE when the cost of motility = 1 and the cost of reproduction = 55.

254

255 **Discussion**

256 Our goal was to conduct a targeted analysis of the parameters influencing the dynamics of r- and K-type cells.  
257 Here, we were able to highlight significant effects of the various parameters used in our simulations, as well as  
258 complex interaction effects, all modulated by pore size and the identity of living cells (mobile or immobile).

259

260 A notable finding is that, in most of the conditions tested, r-strategists exhibit the highest CUE values. However,  
261 this trend must be qualified: all simulations were performed in water-saturated pores, a condition that strongly  
262 influences cell response. Indeed, our simulations show that in dry pores, K-strategists frequently achieve the best  
263 performance.

264 Another important observation concerns the significance of the ‘cost of motility’, which may explain part of the  
265 variance even for immobile populations that do not incur this cost. This is because motile and immobile cells are  
266 present together in the matrices and their population dynamics are linked to each other, notably through competi-  
267 tion. For example, a higher motility cost ( $=5$ ) in the case of small pores can affect motile cell populations. In  
268 small pores, motility is less profitable than in large pores: the benefits that can be derived from it cannot com-  
269 pensate for an excessively high motility cost. Thus, in this situation, immobile cells can take advantage of the un-  
270 favorable situation for their motile counterparts and exhibit higher CUE values (+0.009).

271

272 Although we expected the r and K strategies to produce the most marked contrasts in terms of carbon use effi-  
 273 ciency (CUE), our results show that it is not always the most 'opposite' strategies that generate the strongest dif-  
 274 ferences. Pore size and the functional identity of the cells (mobile or immobile) also significantly modulated the  
 275 responses observed. Furthermore, there was no universally optimal combination of parameters, nor is there any  
 276 particularly deleterious configuration preventing the emergence of viable populations or significant CUE in the  
 277 four simulated contexts. This complementary study suggests that while we chose to explore r and K strategies,  
 278 other combinations of traits could represent less stereotypical but potentially relevant microbial ecological strat-  
 279 egies. We chose r and K because they are well-established archetypes in ecology: the r strategy, focused on rapid  
 280 and inexpensive reproduction, associated with low metabolic costs; and the K strategy, characterized by slow,  
 281 costly reproduction and higher metabolic expenditure. These archetypes, widely described in the literature, are  
 282 thought to be found in various soil environments (Li et al.). The results obtained in this complementary work  
 283 show that rather than being limited to the classic opposition between r and K strategies, our model could be  
 284 adapted to explore a three-dimensional framework inspired by Grime's RSE model, transposed to microbes in the  
 285 form of the "YAS triangle " (Ho et al., 2013; Malik et al., 2020).

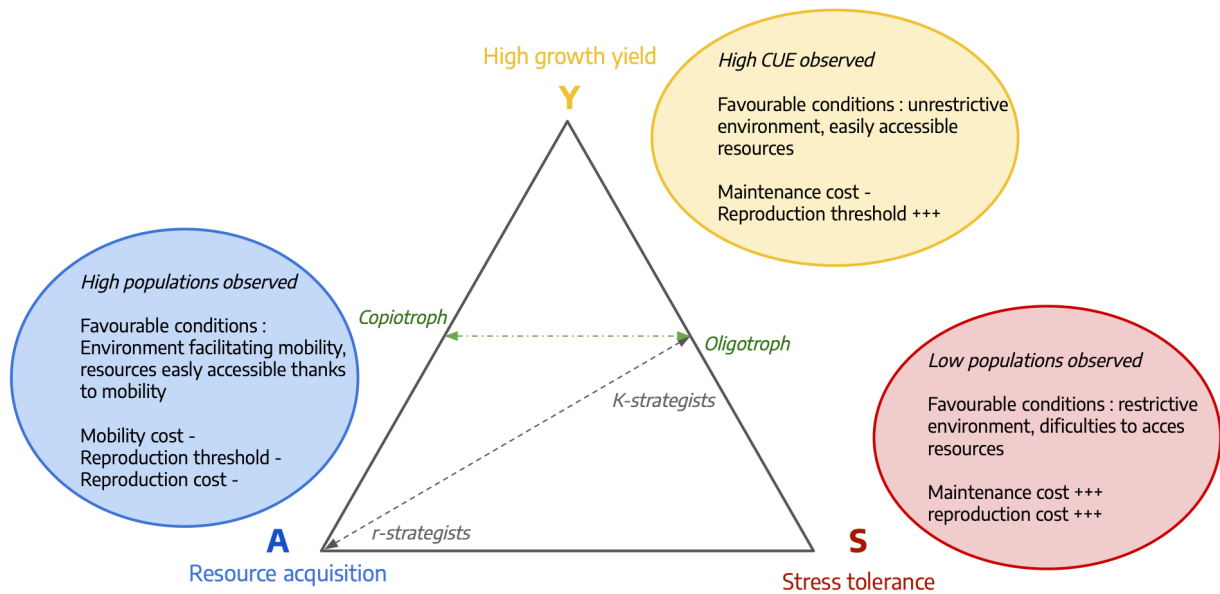

286

287 **Figure S15 :Adaptation of the YAS triangle**
