# Supplementary material
Source: Copernicus journal article supplement (doi:10.5194/egusphere-2026-1818)

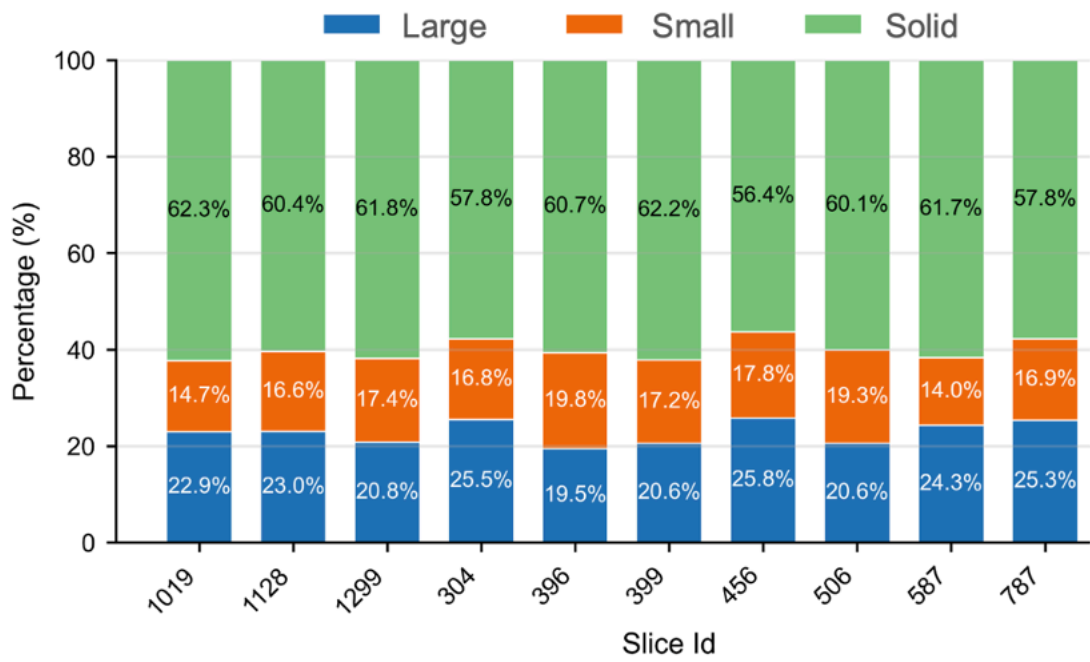

Supplement: Supplementary file [file egusphere-2026-1818-AC1-supplement.pdf]
